## **Rhythmic activity in the medial and orbital frontal cortices tracks reward value and the vigor of consummatory behavior**

Linda M. Amarante and Mark Laubach\*

Department of Neuroscience, American University, Washington, DC, USA

\*Corresponding author:

Mark Laubach, PhD

Department of Neuroscience

American University

4400 Massachusetts Avenue NW

Washington, DC 20016

[mark.laubach@american.edu](mailto:mark.laubach@american.edu)

Abbreviated title: Mechanisms of reward signaling in MFC and OFC

Acknowledgments: We thank Wambura Fobbs, Alexxai Kravitz, Catherine Stoodley, Steve Wise, and Samantha White for helpful feedback on the manuscript.

Conflict of Interest: None

Financial Support: NIH DA046375 to ML and a NSF Graduate Research Fellowship to LMA.

1 ABSTRACT

2 This study examined how the medial frontal (MFC) and orbital frontal (OFC) cortices process  
3 reward information to guide behavior. We simultaneously recorded local field potentials in the  
4 two areas as rats consumed liquid sucrose rewards and examined how the areas collectively  
5 process reward information. Both areas exhibited a 4-8 Hz “theta” rhythm that was phase locked  
6 to the lick cycle. The rhythm similarly tracked shifts in sucrose concentrations and fluid volumes,  
7 suggesting that it is sensitive to general differences in reward magnitude. Differences between  
8 the MFC and OFC were noted, specifically that the rhythm varied with response vigor and  
9 absolute reward value in the MFC, but not the OFC. Our findings suggest that the MFC and  
10 OFC concurrently process reward information but have distinct roles in the control of  
11 consummatory behavior.

## 12 INTRODUCTION

13           The medial and orbital frontal cortices (MFC and OFC) are two of the most studied parts  
14 of the cerebral cortex for their role in value-guided decision making, a process that ultimately  
15 results in animals consuming rewarding foods or fluids. There are extensive anatomical  
16 connections between the various parts of the MFC and OFC in rodents (Gabbott et al., 2003;  
17 Gabbott et al., 2005; Barreiros et al., 2020), and the regions are part of the medial frontal  
18 network (Öngür and Price, 2000). The MFC and OFC are thought to have specific roles in the  
19 control of behavior and specific homologies with medial and orbital regions of the primate frontal  
20 cortex (MFC: Laubach et al., 2018; OFC: Izquierdo, 2017). The extensive interconnections  
21 between MFC and OFC suggest that the two regions work together to control value-guided  
22 decisions. Unfortunately, few, if any, studies have examined concurrent neural processing in  
23 these regions of the rodent brain as animals perform behavioral tasks that depend on the two  
24 cortical regions.

25           In standard laboratory tasks, the action selection and outcome evaluation phases of  
26 value-guided decisions are commonly conceived as separate processes (Rangel et al., 2008).  
27 MFC and OFC may contribute independently to these processes or interact concurrently across  
28 them. Though there is some variation across published studies, most argue for MFC having a  
29 role in action-outcome processing (Alexander and Brown, 2011; Simon et al., 2015) and OFC  
30 having a role in stimulus-outcome (stimulus-reward) processing (Gallagher et al., 1999;  
31 Schoenbaum and Roesch, 2005; Simon et al., 2015). The present study directly compared  
32 neural activity in the MFC and OFC of rats as they performed a simple consummatory task,  
33 called the Shifting Values Licking Task, or SVLT (Parent et al., 2015a). Importantly, the task  
34 depends on the ability of animals to guide their consummatory behavior based on the value of  
35 available rewards, and performance of these kinds of tasks depends on both the MFC (Parent  
36 et al., 2015a,b) and OFC (Kesner and Glibert, 2007). The goal of the study was to use the SVLT

37 to determine if the MFC and OFC have distinct roles in processing reward information, e.g.  
38 varying with action (licking) in MFC and the sensory properties of the rewards in OFC.

39 Most published studies on reward processing used operant designs with distinct actions  
40 preceding different outcomes. For example, a rat might respond in one of two choice ports to  
41 produce a highly valued reward, delivered from a separate reward port. To collect the reward,  
42 the rat has to travel across an operant chamber and then collect a food pellet or initiate licking  
43 on a spout to collect the reward. In such tasks (Pratt and Mizumori, 2001; van Durren et al.,  
44 2009; van Wingerden et al., 2010; Riceberg and Shapiro, 2017; Jarovi et al., 2018; Siniscalchi  
45 et al., 2019), neural activity during the period of consumption might reflect the properties of the  
46 reward, how the animal consumes it, and/or the behaviors that precede reward collection (e.g.  
47 locomotion). As such, it is difficult to isolate reward specific activity using such operant designs.

48 Several published studies have used simpler consummatory and Pavlovian designs, and  
49 found neural activity in the MFC is selectively modulated during active consumption (Petykó et  
50 al., 2009; Horst and Laubach, 2013; Petykó et al., 2015). None of these tasks used fluids with  
51 different reward values. Amarante et al. (2017) was the first study to examine if similar neural  
52 activity was associated with animals consuming different magnitudes of reward. The study used  
53 the SVLT and presented rats with rewards that differed in terms of the concentration of sucrose  
54 contained in the rewarding fluids. The study found that neural activity in the MFC is entrained  
55 the animals' lick cycle and the strength of entrainment varies with the value of the rewarding  
56 fluid, i.e. stronger entrainment with higher value reward. The study also used reversible  
57 inactivation methods to demonstrate the licking entrainment depends on neural activity in the  
58 MFC.

59 In the present study, we used the SVLT, and several variations on the basic task design,  
60 to study consumption related activity in MFC and OFC. A custom designed syringe pump was  
61 used to deliver different volumes of fluid over a common time period (Amarante et al., 2019).

62 Using the custom device, we were able to directly compare neural activity associated with  
63 differences in sucrose concentration and fluid volume. We further manipulated the predictability  
64 of changes in reward magnitude to assess how predictable and unpredictable rewards are  
65 processed and used a third, intermediate level of reward to assess if reward magnitudes are  
66 encoded in a relative or absolute manner. Our findings reveal several similarities – and key  
67 differences – in each cortical region across all behavioral tasks that may allude to specific roles  
68 for MFC and OFC in the control of consummatory behavior.

## 69 METHODS

70 All procedures carried out in this set of experiments were approved by the Animal Care  
71 and Use Committee at American University (Washington, DC). All procedures conformed to the  
72 standards of the National Institutes of Health Guide for the Care and Use of Laboratory Animals.  
73 All efforts were taken to minimize the number of animals used and to reduce pain and suffering.

### 74 *Animals*

75 Male Long Evans and Sprague Dawley rats weighing between 300 and 325 g were  
76 used in these studies (Charles River, Envigo). Rats were given one week to acclimate with daily  
77 handling prior to behavioral training or surgery and were then kept with regulated access to food  
78 to maintain 90% of their free-feeding body weight. They were given ~18 g of standard rat chow  
79 each day in the evenings following experiments. Rats were single-housed in their home cages  
80 in a 12h light/dark cycle colony room, with experiments occurring during the light cycle. A total of  
81 12 rats had a 2x8 microwire array implanted into either the MFC (N=6), the OFC (N=2) or one  
82 array in each area contralaterally (N=4). Arrays consisted of 16 blunt-cut 50- $\mu$ m tungsten  
83 (Tucker-Davis Technologies) or stainless steel (Microprobes) wires, separated by 250  $\mu$ m within  
84 each row and 500  $\mu$ m between rows. *In vitro* impedances for the microwires were ~150 k $\Omega$ .

## 85 *Surgeries*

86           Animals had full access to food and water in the days prior to surgery. Stereotaxic  
87 surgery was performed using standard methods. Briefly, animals were lightly anesthetized with  
88 isoflurane (2.5% for ~2 minutes), and were then injected intraperitoneally with ketamine (100mg/  
89 kg) and dexdomitor (0.25mg/kg) to maintain a surgical plane of anesthesia. The skull was  
90 exposed, and craniotomies were made above the implant locations. Microwire arrays were  
91 lowered into MFC (coordinates from bregma (AP: +3.2 mm; ML: + 1.0 mm; DV: -1.2 mm from  
92 the surface of the brain, at a 12° posterior angle; Paxinos and Watson, 2013) or into OFC (AP:  
93 +3.2 mm, ML: + 4.0 mm, DV: -4.0 mm; Paxinos and Watson, 2013). The part of the MFC  
94 studied here is also called “medial prefrontal cortex” in many rodent studies and the region is  
95 thought to be homologous to the rostral ACC of primates (Laubach et al., 2018). Four skull  
96 screws were placed along the edges of the skull and a ground wire was secured in the  
97 intracranial space above the posterior cerebral cortex. Electrode arrays were connected to a  
98 headstage cable and modified Plexon preamplifier during surgery, and recordings were made to  
99 assess neural activity during array placement. Craniotomies were sealed using cyanoacrylate  
100 (Slo-Zap) and an accelerator (Zip Kicker), and methyl methacrylate dental cement (AM  
101 Systems) was applied and affixed to the skull via the skull screws. Animals were given a  
102 reversal agent for dexdomitor (Antisedan, s.c. 0.25 mg/ml), and Carprofen (5 mg/kg, s.c.) was  
103 administered for postoperative analgesia. Animals recovered from surgery in their home cages  
104 for at least one week with full food and water, and were weighed and monitored daily for one  
105 week after surgery.

## 106 *Behavioral Apparatus*

107           Rats were trained in operant chambers housed within a sound-attenuating external  
108 chamber (Med Associates; St. Albans, VT). Operant chambers contained a custom-made glass

109 drinking spout that was connected to multiple fluid lines allowing for multiple fluids to be  
110 consumed at the same location. The spout was centered on one side of the operant chamber  
111 wall at a height of 6.5 cm from the chamber floor. Tygon tubing connected to the back of the  
112 drinking spout administered the fluid from a 60 cc syringe hooked up to either a PHM-100 pump  
113 (Med Associates) for standard experiments, or to a customized open source syringe pump  
114 controller (Amarante et al., 2019) that is programmed by a teensy microcontroller to deliver  
115 different volumes of fluid with the same delivery time from one central syringe pump. A “light-  
116 pipe” lickometer (Med Associates) detected licks via an LED photobeam, and each lick triggered  
117 the pump to deliver roughly 30  $\mu$ L per 0.5 second. Behavioral protocols were run though Med-  
118 PC version IV (Med Associates), and behavioral data was sent via TTL pulses from the Med-PC  
119 software to the Plexon recording system.

#### 120 *Shifting Values Licking Task*

121 The operant licking task used here is similar to those previously described (Parent et  
122 al., 2015a,b; Amarante et al., 2017). Briefly, rats were placed in the operant chamber for thirty  
123 minutes, where they were solely required to lick at the drinking spout to obtain a liquid sucrose  
124 reward. Licks to the light-pipe lickometer would trigger the syringe pump to deliver liquid sucrose  
125 over 0.5 sec. Every 30 sec, the reward alternated between of high (16% weight per volume) and  
126 low (4% wt./vol.) concentrations of liquid sucrose, delivered in a volume of 30  $\mu$ L. In volume  
127 manipulation sessions, the reward alternated between a large (27.85  $\mu$ L) and small volume  
128 (9.28  $\mu$ L) of 16% liquid sucrose. Rewards were delivered over a period of 0.5 sec for all levels of  
129 concentration and volume using a custom made syringe pump (Amarante et al., 2019). The  
130 animal’s licking behavior was constantly recorded throughout the test sessions.

131 *Blocked versus Randomly Interleaved Licking Task*

132           The Shifting Values Licking Task was altered to allow for comparison of blocked versus  
133 interleaved presentations of reward values. The first three minutes of the task consisted of the  
134 standard Shifting Values Licking Task, with 30 second blocks of either the high or low  
135 concentration sucrose rewards delivered exclusively during the block. After three minutes, the  
136 rewards were presented in a pseudo-random order (e.g., high, high, low, high, low, low, high) for  
137 the rest of the test session. With rewards interleaved, rats were unaware of which reward would  
138 be delivered next. Behavioral and neural data were only analyzed from the first six minutes of  
139 each test session. We focused on manipulating sucrose concentration, and not fluid volume, in  
140 this task variation, as concentration differences provided the most effects of reward value on  
141 licking behavior (see Figure 1D below).

142 *Three Reward Licking Task*

143           The Shifting Values Licking Task was modified, using a third intermediate  
144 concentration of sucrose (8% wt./vol) to assess if reward value influenced behavior and  
145 neuronal activity in a relative or absolute manner. In the first three minutes of each session, rats  
146 received either the intermediate (8%) or low (4%) concentration of sucrose, with the two  
147 rewards delivered over alternating 30 second periods as in the SVLT. After three minutes, the  
148 rewards switched to the high (16%) and intermediate (8%) concentrations, and alternated  
149 between those concentrations for the rest of the session. Behavioral and neural data were only  
150 analyzed from the first six minutes of each test session.

151 *Electrophysiological Recordings*

152           Electrophysiological recordings were made using a Plexon Multichannel Acquisition  
153 Processor (MAP; Plexon; Dallas, TX). Local field potentials were sampled on all electrodes and



154 recorded continuously throughout the behavioral testing sessions using the Plexon system via  
155 National Instruments A/D card (PCI-DIO-32HS). The sampling rate was 1 kHz. The head-stage  
156 filters (Plexon) were at 0.5 Hz and 5.9 kHz. Electrodes with unstable signals or prominent peaks  
157 at 60 Hz in plots of power spectral density were excluded from quantitative analysis.

### 158 *Histology*

159 After all experiments were completed, rats were deeply anesthetized via an  
160 intraperitoneal injection of Euthazol (100mg/kg) and then transcardially perfused using 4%  
161 paraformaldehyde in phosphate-buffered saline. Brains were cryoprotected with a 20% sucrose  
162 and 10% glycerol mixture and then sectioned horizontally on a freezing microtome. The slices  
163 were mounted on gelatin-subbed slides and stained for Nissl substance with thionin.

### 164 *Data Analysis: Software and Statistics*

165 All data were analyzed using GNU Octave (<https://www.gnu.org/software/octave/>),  
166 Python (Anaconda distribution: <https://www.continuum.io/>), and R (<https://www.r-project.org/>).  
167 Analyses were run as Jupyter notebooks (<http://jupyter.org/>). Computer code used in this study  
168 is available upon request from the corresponding author.

169 Statistical testing was performed in R. Paired t-tests were used throughout the study  
170 and one or two-way ANOVA (with the error term due to subject) were used to compare data for  
171 both behavior and electrophysiological measures (maximum power and maximum inter-trial  
172 phase coherence) for high and low value licks, blocked versus interleaved licks, and high-  
173 intermediate-low licks. For significant ANOVAs, the error term was removed and Tukey's post-  
174 hoc tests were performed on significant interaction terms for multiple comparisons. Descriptive  
175 statistics are reported as mean  $\pm$  SEM, unless noted otherwise.

176 *Data Analysis: Behavior*

177 All rats were first run for at least five standard sessions in the standard Shifting Values  
178 Licking Task with differences in concentration (16% and 4% wt./vol.). Rats have been shown to  
179 acquire incentive contrast effects in the SVLT after this duration of training (Parent et al.,  
180 2015a). For the Blocked-Interleaved and Three Reward tasks, rats were tested after extensive  
181 experience in the SVLT and after two “training” sessions with the Blocked-Interleaved and Three  
182 Reward designs. The electrophysiological recordings reported here were from the animals’ third  
183 session in each task.

184 Behavioral measures included total licks across the session, the duration and number  
185 of licking bouts, and the median inter-lick intervals (inverse of licking frequency). Bouts of licks  
186 were defined as having at least 3 licks within 300 ms and with an inter-bout interval of 0.5 sec or  
187 longer. Bouts were not analyzed in the Blocked-Interleaved Task; due to the unique structure of  
188 the task, bouts were all shortened by default due to a constantly changing reward in the  
189 interleaved phase of the task. While bouts of licks were reported in most tasks,  
190 electrophysiological correlates around bouts were not analyzed because there were often too  
191 few bouts (specifically for the low-lick conditions) in each session to deduce any  
192 electrophysiological effects of reward value on bout-related activity.

193 For analyzing lick rate, inter-lick intervals during the different types of rewards were  
194 obtained, and then the inverse of the median inter-lick interval provided the average lick rate in  
195 Hertz. Any inter-lick interval greater than 1 sec or less than 0.09 sec was excluded from the  
196 analysis. For licks during the randomly interleaved portion of the Blocked-Interleaved Task,  
197 more than two licks in a row were needed to calculate lick rate. To analyze behavioral variability  
198 of licks, we used coefficient of variation (ratio of the standard deviation to the mean) on high and  
199 low value inter-lick intervals that occurred within bouts.

200 *Data Analysis: Local Field Potentials*

201           Electrophysiological data were first analyzed in NeuroExplorer  
202 (<http://www.neuroexplorer.com/>), to check for artifacts and spectral integrity. Subsequent  
203 processing was done using signal processing routines in GNU Octave. Analysis of Local Field  
204 Potentials (LFP) used functions from the EEGLab toolbox (Delorme and Makeig, 2004) (Event-  
205 Related Spectral Power and Inter-Trial Phase Coherence) and the signal processing toolbox in  
206 GNU Octave (the peak2peak function was used to measure event-related amplitude). Circular  
207 statistics were calculated using the circular library for R. Graphical plots of data were made  
208 using the matplotlib and seaborn library for Python. Analyses were typically conducted in  
209 Jupyter notebooks, and interactions between Python, R, and Octave were implemented using  
210 the rpy2 and oct2py libraries for Python.

211           To measure the amplitude and phase of LFP in the frequency range of licking, LFPs  
212 were bandpass-filtered using eeglab's eegfilt function, with a fir1 filter (Widmann and Schröger,  
213 2012), centered at the rat's licking frequency (licking frequency + inter-quartile range; typically  
214 around 4 to 9 Hz), and were subsequently z-scored. Analyses were performed with a pre/post  
215 window of 2 seconds, and the Hilbert transform was used to obtain LFP amplitude and phase.

216           For inter-trial phase coherence (ITC) and event-related spectral power (ERSP), LFP  
217 data was preprocessed using eeglab's eegfilt function with a fir1 filter and was bandpass filtered  
218 from 0 to 100 Hz. For group summaries, ITC and ERSP matrices were z-scored for that given  
219 rat after bandpass filtering the data. Peri-lick matrices were then formed by using a pre/post  
220 window of 2 seconds on each side, and the newtimef function from the eeglab toolbox was used  
221 to generate the time-frequency matrices for ITC and ERSP up to 30 Hz.

222           Since most of the lick counts from the Shifting Values Licking Task are generally  
223 imbalanced (with a greater number of licks for high versus low value rewards), we used  
224 permutation testing to perform analyses on amplitude and phase-locking in these studies. Licks

225 were typically down-sampled to match the lower number of licks. 80% of the number of lower  
226 value licks were randomly chosen from each session. For example, if a rat emitted 400 licks for  
227 the high concentration sucrose and 200 licks for the low concentration sucrose, then 160 licks  
228 would be randomly chosen from each of data type to compare the same number of licks for  
229 each lick type. This permutation of taking 80% of the licks was re-sampled 25 times and spectral  
230 values were recalculated for each permutation. The maximum ITC value was obtained through  
231 calculating the absolute value of ITC values between 2 to 12 Hz within a ~150 ms window (+1  
232 inter-lick interval) around each lick. The maximum ERSP value was also taken around the same  
233 frequency and time window. Then, the average maximum ITC or ERSP value (of the 25x  
234 resampled values) for each LFP channel for each rat was saved in a data frame, and each  
235 electrode's maximum ITC and ERSP value for each type of lick (high-value or low-value lick)  
236 were used in the ANOVAs for group summaries. Group summary for the peak-to-peak Event-  
237 Related Potential (ERP) size recorded the average difference between the maximum and  
238 minimum ERP amplitude across all frequencies, using + 1 inter-lick interval window around  
239 each lick. The mean ERP size for each electrode for each rat was used in the ANOVAs for  
240 group summaries. These analyses were performed for all behavioral variations.

## 241 RESULTS

### 242 *Shifting Values Licking Task: Effects of reward magnitude on consummatory behavior*

243 The Shifting Values Licking Task (Amarante et al., 2017; Figure 1A) was used to  
244 assess reward encoding across the MFC and OFC as 12 rats experienced shifts in reward value  
245 defined by differences in sucrose concentration or fluid volume. Shifts in concentration were  
246 between 16% and 4% sucrose in a volume of 30  $\mu$ L. Shifts in volume were between 30  $\mu$ L and  
247 10  $\mu$ L containing 16% sucrose. Concentrations and volumes alternated over periods of 30 sec

248 (Figure 1B, left). LFP activity was recorded from 16-channel multi-electrode arrays in the MFC in  
249 10 of the 12 rats and OFC in 6 of the 12 rats (Supplementary Figure 1).

250 Several measures of licking behavior varied with sucrose concentration or fluid  
251 volume: lick counts, inter-lick intervals, lick rate, and bout duration (Figure 1C). All rats licked  
252 more for the high concentration reward compared to the low concentration reward (paired t-test;  
253  $t(11)=10.76$ ,  $p<0.001$ ) (Figure 1D). Rats also licked at a faster rate for the high concentration  
254 reward compared to the low concentration reward (paired t-test;  $t(11)=6.347$ ,  $p<0.001$ ) (Figure  
255 1E). Additionally, rats had increased bout durations when licking for the high concentration  
256 reward compared to the low concentration reward (paired t-test:  $t(11)=2.9439$ ,  $p=0.013$ ) (Figure

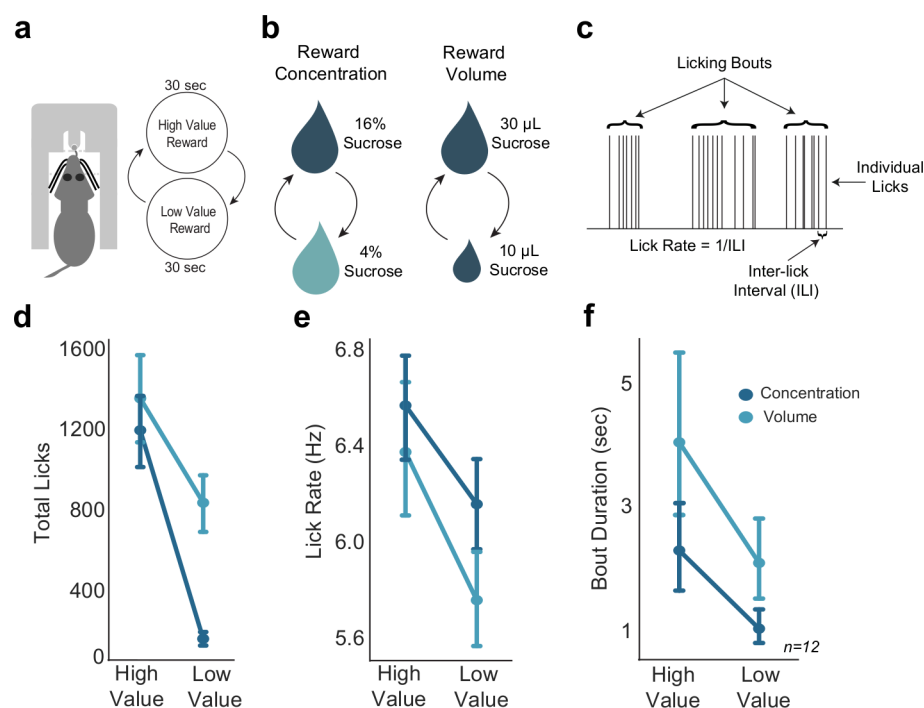

**Figure 1. Consummatory behavior tracked shifts in sucrose concentration and fluid volume.** A. In the Shifting Values Licking Task, rats received access to one of two values of reward, with rewards alternating every 30 sec. B. Manipulation of reward value by changing either concentration or volume. C. Types of behavioral licking measurements recorded in all licking tasks. D,E,F. Rats licked more (D), faster (E), and over longer bouts (F) for the high concentration and large volume rewards. Error bars represent SEM.

257 1F). There was no difference in variability of high or low concentration licks: the coefficient of  
 258 variation for inter-lick intervals was the same (paired t-test:  $t(9)=0.864$ ,  $p=0.41$ ).

259 Rats behaved similarly when consuming the high concentration and large volume  
 260 rewards. In volume manipulation sessions, rats emitted more licks for the large reward than the  
 261 small reward (paired t-test;  $t(11)=4.99$ ,  $p<0.001$ ). However, this difference in lick counts was  
 262 less robust than the difference in high and low concentration rewards during concentration  
 263 manipulation sessions (Figure 1D). Rats licked at a faster rate for large rewards compared to

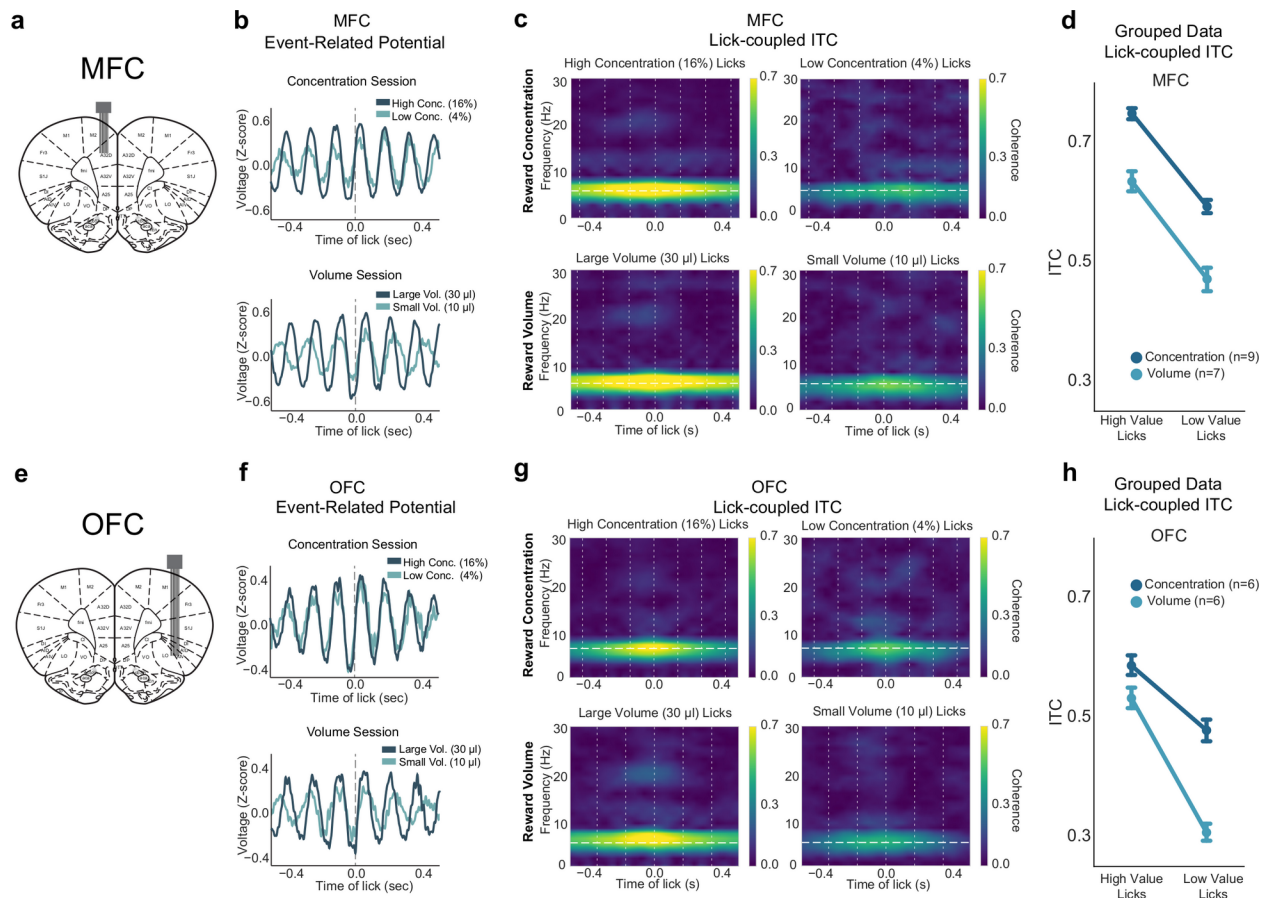

**Figure 2. Lick-entrained neural activity in MFC and OFC tracked shifts in sucrose concentration and fluid volume.** A,E. Rats were implanted with a 2x8 electrode array in either MFC (A) or OFC (E). B,F. Event-related potentials during concentration and volume manipulation sessions in the Shifting Values Licking Task for MFC (B) and OFC (F). C,G. Spectral ITC time-frequency plots revealed strong phase locking during licks for the high concentration and large volume (left sides) rewards in both MFC (C) and OFC (G). Plots are from one electrode from one individual animal. ITC is consistently strongest around 4-8 Hz. D,H. Grouped data from all rats in both concentration and volume sessions in MFC (D) and OFC (H) showed strongest ITC during licks for the high value reward. Error bars represent SEM.

264 small volume rewards (paired t-test;  $t(11)=6.311$ ,  $p<0.001$ ) (Figure 1E), and licking bouts were  
265 longer for large rewards compared to bouts to consume small rewards (Figure 1F), (paired t-  
266 test;  $t(11)=2.569$ ,  $p=0.027$ ).

267 *Shifting Values Licking Task: Lick entrainment in MFC and OFC tracks reward magnitude*

268 We next aimed to determine if there were electrophysiological differences in MFC and  
269 OFC during access to the different types of rewards. We focused on three key measurements of  
270 local field potential (LFP) activity: amplitude (as measured by the amplitude of the ERP;  
271 Supplementary Figure 2A), spectral power (as measured by ERSP; Supplementary Figure 2B),  
272 and phase (as measured by ITC, Supplementary Figure 2C). We recorded LFP activity from  
273 both cortical areas as rats consumed the different types of rewards (concentration or volume) in  
274 the Shifting Values Licking Task (Figure 2A,E).

275 Similar to Amarante et al. (2017), LFP activity in MFC was entrained to the lick cycle  
276 and varied with value (Figure 2B-D, top). Uniquely, we found similar lick-entrained activity in  
277 OFC that also varied with value (Figure 2F-H). Time-frequency analyses for both cortical areas  
278 revealed elevated ITC between 4 and 8 Hz for licks that delivered the high concentration liquid  
279 sucrose but not the low concentration sucrose (Figure 2C,G). That is, the phase angles of the  
280 LFP fluctuations were more consistent when rats consumed the high concentration fluid  
281 compared to the low concentration fluid. This result was observed in all rats that were tested  
282 (dark blue lines in Figure 2D,H) (MFC:  $F(1,278)=443$ ,  $p<0.001$ ; OFC:  $F(1,177)=77.31$ ,  $p<0.001$ ;  
283 one-way ANOVAs with an error term for within-subject variation). Analysis of phase coherence  
284 (Supplementary Figure 2D) and event-related power (Supplementary Figure 2E) revealed  
285 effects solely in the 4-8 Hz (theta) frequency range.



286 To assess differences in power, we used a peak-to-peak analysis of ERPs during licks  
287 for the high-value and low-value rewards. The measure calculates the difference in the  
288 maximum and minimum ERP amplitude using a window centered around each lick. The size of  
289 the window was twice each rat's median inter-lick interval. LFPs in MFC showed increased  
290 amplitudes for high concentration rewards, as opposed to low concentration rewards (one-way  
291 ANOVA:  $F(1,278)=34.19$ ,  $p<0.001$ ). Figure 2B shows MFC ERPs for high and low concentration  
292 rewards of an example rat. This effect was not significant in OFC ERPs, as seen in Figure 2F  
293 ( $F(1,177)=0.557$ ,  $p=0.456$ ). We also measured ERSP, and found a decrease in MFC power  
294 from licks for the high to low concentration rewards specifically in the 4-8 Hz range  
295 ( $F(1,278)=18.72$ ,  $p<0.001$ ; one-way ANOVA); there was no major difference in ERSP measures  
296 in OFC ( $F(1,177)=0.039$ ,  $p=0.843$ ).

297 We then manipulated the size of the reward and recorded LFP activity from MFC and  
298 OFC. Unlike the variable concentration session, event-related potentials in MFC or OFC alone  
299 did not distinguish between large versus small volume rewards (MFC:  $F(1,216)=0.865$ ,  $p=0.354$ ;  
300 OFC: ( $F(1,179)=1.876$ ,  $p=0.173$ ); one-way ANOVAs) (Figure 2B,F, bottom). There was no major  
301 difference in event-related spectral power during licks for large or small rewards in MFC or OFC  
302 (MFC:  $F(1,216)=0.877$ ,  $p=0.35$ ; OFC:  $F(1,179)=1.76$ ,  $p=0.186$ ); one-way ANOVAs). However, in  
303 both MFC and OFC, rats showed similar 4-8 Hz phase-locking for large rewards (Figure 2C,G,  
304 bottom), closely resembling what we observed with high concentration rewards (Figure 2C,G,  
305 top), which was significantly increased from phase-locking for small rewards (MFC:  
306  $F(1,216)=138.5$ ,  $p<0.001$ ; OFC:  $F(1,179)=280.8$ ,  $p<0.001$ ; one-way ANOVA). This effect was  
307 consistent across all rats tested (light blue lines in Figure 2D,H).

308 These findings suggest that LFP activity in both MFC and OFC similarly encodes  
309 aspects of preferred, versus less preferred, reward options. 4-8 Hz phase-locking was strongest  
310 for both the high concentration and large volume rewards, which may be evidence that the



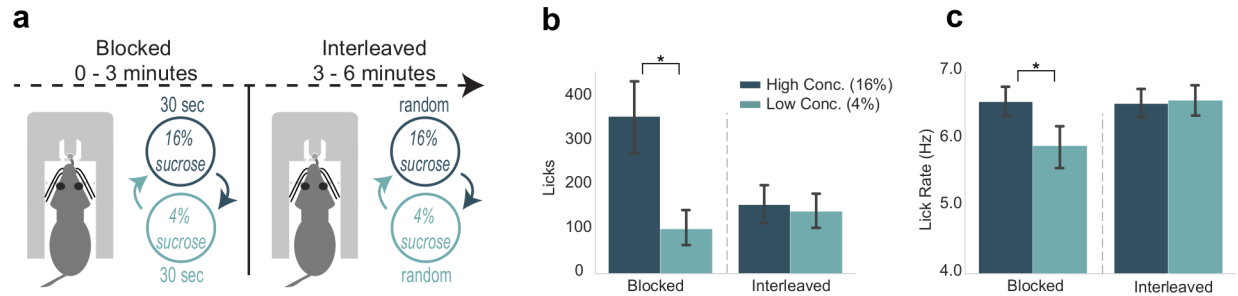

**Figure 3. Engagement in and the vigor of licking varied with reward expectation.** A. Rats participated in a modification of the Shifting Values Licking Task, called the Blocked-Interleaved Task, in which they received alternating access to high and low concentrations of liquid sucrose for three minutes and then received interleaved (and thus unpredictable) presentations of the two levels of sucrose for the rest of the session. B. Total licks emitted for both high and low concentration rewards during the blocked and interleaved portion of the task. Rats licked less for both rewards when rewards were randomly interleaved. C. Lick rate was similar for both rewards in the interleaved, but not blocked, portion of the task. Asterisk denotes  $p < 0.05$ . Error bars represent SEM.

311 animal is acting within a preferred state with the goal of obtaining their most “valued” reward.

312 These findings provided further evidence suggesting that the entrainment of neural activity in

313 MFC and OFC to the lick cycle tracks reward magnitude.

314 *Blocked-Interleaved Task: Engagement in and the vigor of licking vary with reward expectation*

315 The same group of 12 rats were subsequently tested in an adjusted version of the

316 Shifting Values Licking Task, which will be referred to as the Blocked-Interleaved Task (Figure

317 3A). In the first three minutes of the task, i.e. the “blocked” phase, rats behaviorally showed their

318 typical differentiation of high versus low concentration rewards by emitting more licks for the

319 high concentration reward (Figure 3B, left), and licked at a faster rate (Figure 3C, left). However,

320 this pattern changed when the rewards were randomly presented in the “interleaved” part of the

321 task. With a randomly interleaved reward presentation, rats licked nearly equally for high and

322 low concentration rewards (Figure 3B, right). We performed a two-way ANOVA on the number

323 of licks by each lick type (high or low concentration) and portion of the task (blocked or

324 interleaved). There was a significant interaction between concentration of reward and the

325 blocked or interleaved portion of the task ( $F(1,33)=24.51$ ,  $p<0.001$ ). Post-hoc analyses revealed  
326 that while there was a significant difference in high and low concentration licks during the  
327 blocked portion ( $p<0.001$ ), there was no difference between high and low concentration licks  
328 during the interleaved portion of the task ( $p=0.98$ ).

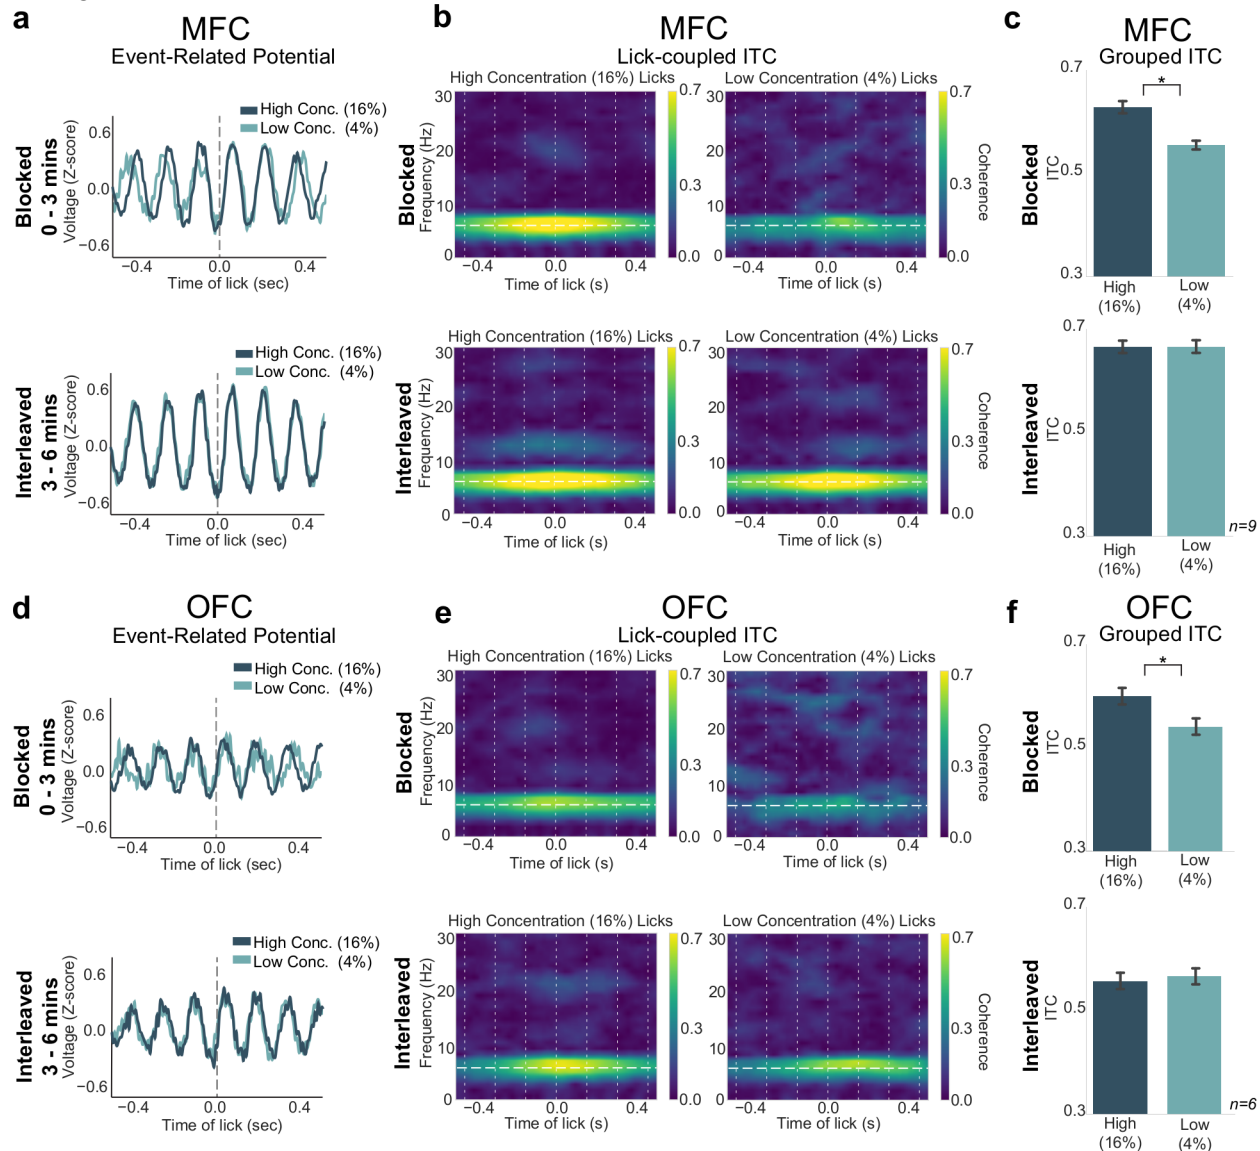

**Figure 4. Lick-entrained neural activity varied with reward expectation.** A,D. ERPs for licks of both rewards in MFC (A) and OFC (D) remain unchanged during the interleaved portion of the task. B,E. Spectral ITC plots revealed stronger 4-8 Hz phase-locking during licks for the high concentration reward in the blocked portion (top), but phase-locking during licks for high and low concentration rewards in the interleaved portion were indistinguishable from each other. C,F. Grouped data revealed no difference in ITC values during high or low concentration licks in the interleaved phase. Asterisk denotes  $p<0.05$ . Error bars represent SEM.

329            Additionally, there was a significant difference in lick rate by each lick type and portion  
330 of the task ( $F(1,33)=23.13$ ,  $p<0.001$ ; two-way ANOVA) (Figure 3C). Post hoc analyses revealed  
331 that rats licked significantly faster for high versus low concentration rewards during the blocked  
332 portion ( $p<0.005$ ). Lick rates for high versus low concentration licks during the interleaved part  
333 of the task were not significantly different ( $p=0.99$ ). Notably, lick rate during access to either  
334 high concentration ( $p=0.005$ ) or low concentration ( $p=0.002$ ) rewards during the interleaved  
335 portion was significantly increased from lick rate during access to the low concentration reward  
336 in the blocked portion of the task.

337 *Blocked-Interleaved Task: Dissociation of MFC and OFC with regards to response vigor*

338            Having established that the Blocked-Interleaved Task can reveal effects of reward  
339 expectation on task engagement and response vigor, we next examined how neural activity in  
340 the MFC and OFC varies with these behavioral measures. We assessed changes in lick-  
341 entrained ERPs and their amplitudes (Figure 4A,D), ERSP, and ITC (phase-locking) (Figure 4B-  
342 C,E-F). LFPs in MFC and OFC showed strong 4-8 Hz phase-locking during licks for the high  
343 concentration rewards in the blocked phase of the task (Figure 4B,E). We performed a two-way  
344 ANOVA on maximum ITC values (Figure 4C,F) from LFPs in both MFC and OFC for each rat  
345 and each electrode channel with interaction terms for lick type (high or low concentration  
346 reward) and portion of the task (blocked or interleaved reward access), and found a significant  
347 interaction of lick type by portion of the task (MFC:  $F(1,572)=10.45$ ,  $p=0.001$ ); OFC:  
348  $F(1,363)=12.119$ ,  $p<0.001$ ). Post-hoc analyses revealed that while there was a significant  
349 difference in phase-locking of licks for high versus low concentration in the blocked portion  
350 (MFC:  $p<0.001$ ; OFC:  $p<0.036$ ), there was no difference in phase-locking of licks for high versus  
351 low concentration rewards in the interleaved portion of the task (MFC:  $p=0.999$ ; OFC:  $p=0.973$ ).

352 In MFC, a two-way ANOVA revealed a significant interaction of lick type by portion of  
353 the task with ERP peak-to-peak size (Figure 4A) as the dependent variable ( $F(1,564)=6.232$ ,  
354  $p=0.013$ ). However, there were no differences between the ERP measures between high and  
355 low concentration licks during the blocked portion of the task ( $p=0.887$ ) and between high and  
356 low concentration licks during the interleaved portion of the task ( $p=0.938$ ). The same was true  
357 with ERSP measures for MFC LFPs; There was a significant interaction between lick type and  
358 portion of the task ( $F(1,564)=30.17$ ,  $p<0.001$ ; two-way ANOVA), but no significant difference  
359 between ERSP values between high and low concentration licks in the blocked ( $p=0.213$ ) or  
360 interleaved ( $p=0.743$ ) portions of the task. In OFC (Figure 4D), there was no significant  
361 interaction of lick type and portion of the task by the amplitude size of the lick's ERPs  
362 ( $F(1,363)=0.131$ ,  $p=0.718$ ; two-way ANOVA), and no difference in OFC ERSP values of lick  
363 type by portion of the task either ( $F(1,363)=0.744$ ,  $p=0.389$ ; two-way ANOVA).

364 We wanted to further investigate potential differences in MFC and OFC in the  
365 Blocked-Interleaved Task, since initial results show a general increase of ITC values from MFC  
366 in the interleaved portion of the task and a general decrease in ITC values from OFC. This was

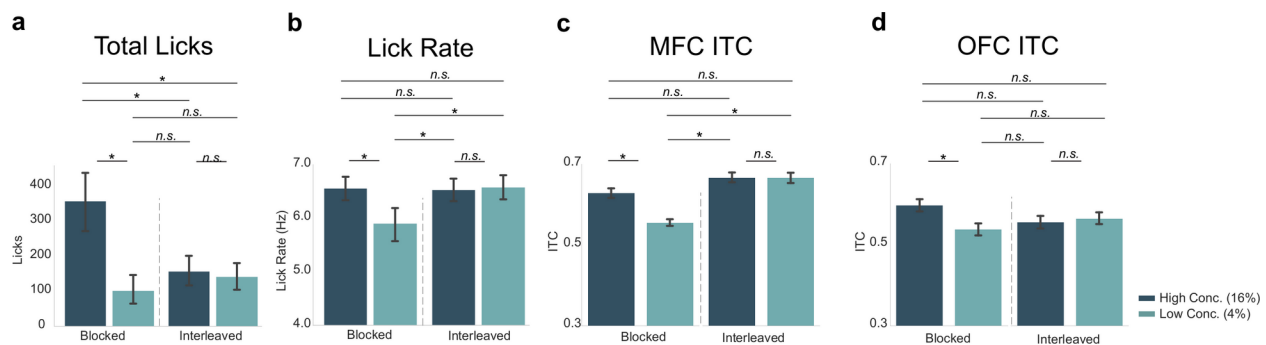

**Figure 5. Neural activity in MFC, but not OFC, varied with the lick rate (vigor) and not task engagement (total licks).** Post-hoc contrasts of statistically significant effects revealed by two-way ANOVA. Direct comparison of behavioral measures (A – total licks; B – lick rate) with MFC ITCs (C) and OFC ITCs (D) showed a similar pattern (and identical post-hoc statistical contrasts) between lick rate (B) and MFC ITCs (C). The pattern of post-hoc contrasts for OFC ITCs (D) did not match either total licks or lick rate. Asterisk denotes  $p<0.05$ . Error bars represent SEM.

367 of particular interest since MFC ITC values varied with the lick rate, which increased for both the  
368 high and low concentration licks in the interleaved portion of the task.

369 We directly compared ITC values in both regions with lick rate and total lick counts  
370 (Figure 5). Post-hoc analyses displayed in Figure 5C revealed that in MFC there was a  
371 significant difference between ITC values for the high versus low concentration licks (as also  
372 documented at the top of Figure 4C), but ITC values for high concentration licks during the  
373 blocked portion of the task did not differ from ITC values for either the high ( $p=0.075$ ) or low  
374 concentration ( $p=0.089$ ) conditions in the interleaved portion of the task. The pattern of post-hoc  
375 contrasts matches the lick-rate data (Figure 5B) for all paired comparisons. This match includes  
376 the finding (Figure 5C) that ITC values for low concentration licks in MFC differed from all three  
377 of the other conditions (high concentration blocked, high concentration interleaved, and low  
378 concentration interleaved licks;  $p<0.001$  for each comparison). The MFC ITC post-hoc test  
379 results (Figure 5C) did not match the pattern for total licks (Figure 5A).

380 In OFC, ITC values (Figure 5D) did not match either the total-lick (Figure 5A) or lick-  
381 rate (Figure 5B) comparisons, despite the qualitative similarity with the total number of licks  
382 (compare Figure 5D with Figure 5A). The only significant difference in ITC values in OFC was  
383 between the high and low concentration licks in the blocked portion of the task (as also  
384 documented at the top of Figure 4F). All other comparisons were non-significant. This pattern of  
385 post-hoc comparisons did not match either total licks (compare Figure 5A with 5D) or lick rate  
386 (compare Figure 5B with 5D).

387 Together with the results summarized in Figure 4, these findings from post-hoc testing  
388 in Figure 5 provide evidence that MFC and OFC encode different aspects of licking and reward  
389 value. There was a clear match between the pattern of lick entrainment in the MFC, but not the  
390 OFC, with the animals' licking rates. The correspondence between lick entrainment in MFC and  
391 the animals' lick rates provides support for the idea that MFC plays a role in response vigor. By

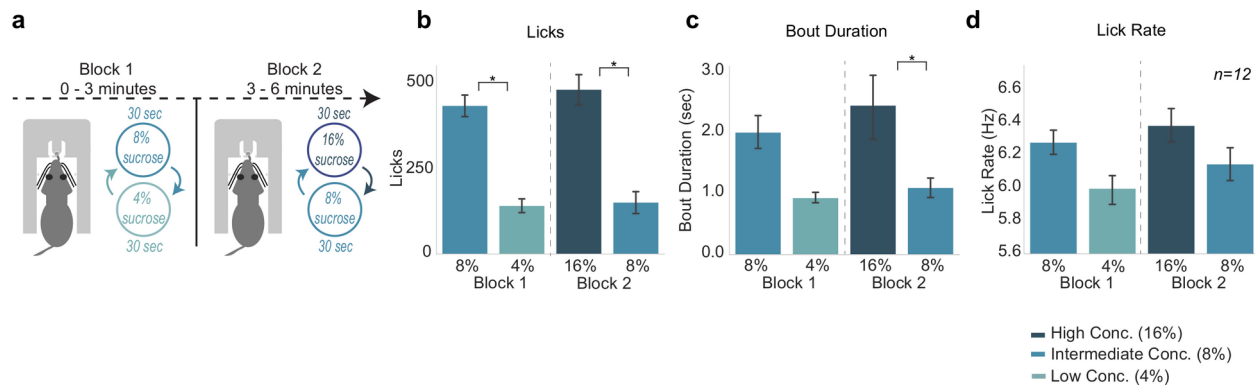

**Figure 6. Consummatory behavior tracked relative differences in reward value.** A. The Three Reward Task is a variation of Shifting Values Licking Task but with a third reward introduced. In the first block of the task, rats experience the intermediate (8%) reward and low (4%) reward. In block 2, rats experience the high (16%) reward paired with the intermediate (8%) reward. B. Rats licked more for the sweeter reward in each block. C. Rats showed greater bout durations for the sweeter reward. D. Lick rate showed a similar pattern to licks and bout duration, but was not statistically significant. Asterisk denotes  $p < 0.05$ . Error bars represent SEM.

392 contrast, OFC might be involved in more general aspects of motivation, e.g. to lick or not

393 (reward evaluation) based on reward magnitude or the predictability of the environment.

#### 394 *Three Reward Task: Behavioral evidence for effects of relative reward value*

395 The previous experiments assessed comparison of two levels of rewards (either  
 396 high/low concentration or large/small volume) in the Shifting Values Licking Task. After seeing  
 397 clear behavioral and electrophysiological differences between two rewards, we aimed to  
 398 investigate how animals process reward with contexts involving three different rewards. In this  
 399 experiment, we assessed if rats process rewards in a relative manner or in an absolute manner  
 400 by implementing a third intermediate (8% wt./vol. sucrose concentration) reward.

401 In the Three Reward Task (Figure 6A), the first block consists of the Shifting Values  
 402 Licking Task with 30 sec shifts between the intermediate value (8% sucrose) reward and the low  
 403 value (4% sucrose) reward. After 3 minutes the second block of the task begins, where rats then  
 404 experience shifting values of reward from the high value (16% sucrose) reward to the

405 intermediate value (8% sucrose) reward. This allowed us to assess how rats would process the  
406 intermediate 8% sucrose reward when it is paired with a worse (4%) or better (16%) option  
407 within one session. Additionally, the design introduces a second context (just like in the  
408 Blocked-Interleaved Task previously) in which we could assess if animals are still processing a  
409 (temporally) local comparison of reward types.

410 Licking varied with both reward value and block, i.e. low vs intermediate and  
411 intermediate vs high ( $F(3,33)=34.2$ ,  $p<0.001$ ) (Figure 6B). Post-hoc analyses revealed that rats  
412 emitted significantly more licks for the intermediate value 8% reward as opposed to the low  
413 value 4% reward in block 1 ( $p<0.001$ ). In block 2, rats also emitted significantly fewer licks for  
414 the intermediate value 8% reward when it was paired with the high value 16% reward ( $p<0.001$ ).  
415 Rats also licked significantly less for the intermediate 8% reward in block 2 than they did in  
416 block 1 ( $p<0.001$ ).

417 There was a more subtle effect for differences in bout duration across the different  
418 rewards ( $F(3,33)=5.333$ ,  $p=0.004$ ; two-way ANOVA) (Figure 6C). Post-hoc analyses revealed  
419 no significant difference in bout duration for the 4% versus 8% in block one ( $p=0.098$ ), yet there  
420 was a significant decrease in bout durations during access to the 8% versus 16% in block two  
421 ( $p=0.023$ ). Bout durations during access to the intermediate 8% reward in block 1 versus block  
422 2 were not different ( $p=0.20$ ). While there was a significant effect of lick type on lick rate  
423 ( $F(3,33)=10.59$ ,  $p<0.001$ ; two-way ANOVA), post-hoc analyses revealed no major differences in  
424 lick rate of the licks for rewards in block 1 ( $p=0.17$ ) or block 2 ( $p=0.31$ ) (Figure 6D), nor for the  
425 lick rate for 8% licks in block 1 versus block 2 ( $p=0.76$ ).

### 426 *Three Reward Task: Neural evidence for effects of absolute, not relative, reward value*

427 The behavioral measures summarized above established that the Three Reward Task  
428 can reveal effects of relative value comparisons. We next analyzed electrophysiological signals



429 from MFC and OFC (Figure 7) to determine if they tracked the animals' behavior in the task, and  
 430 might encode relative differences in value, or some other aspect of value, such as the absolute  
 431 differences between the three rewards. We found a significant difference between ITC values  
 432 for the three different rewards in both MFC and OFC (MFC:  $F(3,627)=154.4$ ,  $p<0.001$ ; OFC:  
 433  $F(3,363)=13.29$ ,  $p<0.001$ ; two-way ANOVAs). Tukey post-hoc analyses revealed a difference in

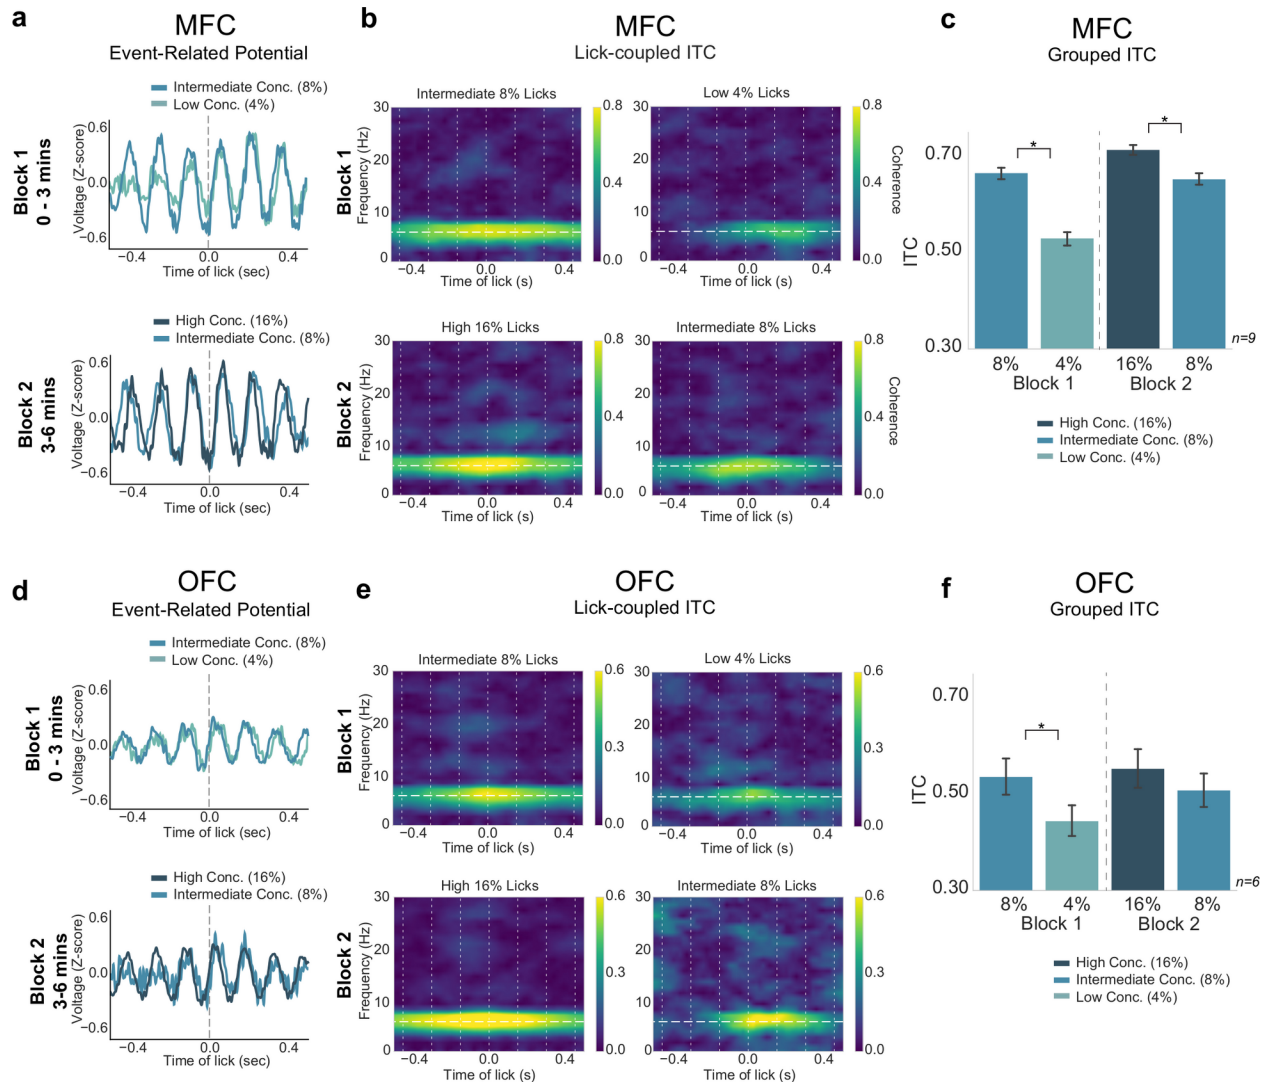

**Figure 7. Neural activity in MFC, but not OFC, tracked absolute differences in reward value.** A,D. ERPs for each block of the task from MFC (A) and OFC (D). B,E. ITC values in MFC (B) and OFC (E) showed strongest 4-8 Hz phase locking for the “high value” reward in each block. C,F. Group data revealed significantly greater ITC values for the high value reward in each block for MFC ITCs (C), and a similar pattern was found in OFC (F) but only block 1 rewards were significantly different. Asterisk denotes  $p<0.05$ . Error bars represent SEM.



434 ITC values between intermediate and low licks in block 1 (MFC:  $p < 0.001$ ; OFC:  $p = 0.003$ ), and a  
 435 difference in ITCs between high and intermediate licks in block 2 for MFC only (MFC:  $p < 0.005$ ;  
 436 OFC:  $p = 0.313$ ) (Figure 7B-C,E-F). There was no difference between ITC values from  
 437 intermediate (8%) block 1 and intermediate block 2 licks in both regions (MFC:  $p = 0.881$ ; OFC:  
 438  $p = 0.705$ ). There was a significant difference between MFC ITC values for block 1 intermediate  
 439 (8%) licks and block 2 high (16%) licks ( $p = 0.028$ ), as well as a significant difference between  
 440 MFC ITC values for block 1 low (4%) licks and block 2 intermediate (8%) licks ( $p < 0.001$ ).  
 441 Signals from the OFC did not differ across these conditions.

442 Peak to peak amplitude analysis of the Three Reward Task revealed a significant  
 443 effect of block on MFC LFP amplitude across lick types ( $F(3,627) = 15.56$ ,  $p < 0.001$ ; two-way  
 444 ANOVA) (Figure 7A). Tukey post-hoc testing revealed no relevant significant differences  
 445 between ERP size in MFC (between block 1 intermediate and low licks:  $p = 0.864$ ; between block  
 446 2 high and intermediate licks:  $p = 0.944$ ). There was no difference in OFC amplitude size  
 447 ( $F(3,363) = 0.827$ ,  $p = 0.479$ , two-way ANOVA) (Figure 7D). While there was a significant effect for  
 448 ERSP values in both MFC and OFC (MFC:  $F(3,627) = 18.35$ ,  $p < 0.001$ ; OFC:  $F(3,363) = 5.108$ ,

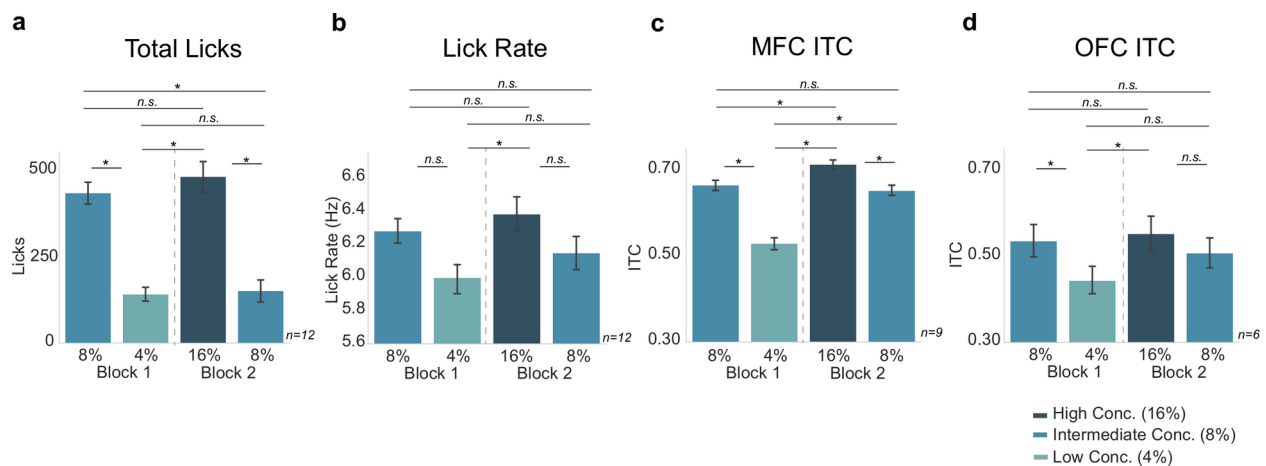

**Figure 8. Neural activity in MFC, but not OFC, varied with effects of absolute reward value on lick rate (vigor) and task engagement (total licks).** A,B. Behavioral measures replotted with significance bars for each combination reward. MFC ITCs (C) did not show the exact same pattern as lick rate, which is different from Figure 5. OFC ITCs (D) did not look like total licks or lick rate. Asterisk denotes  $p < 0.05$ . Error bars represent SEM.

449  $p=0.002$ ; two-way ANOVAs), none of the relevant measures were significant (block 1  
450 intermediate and low licks: MFC:  $p=0.875$ ; OFC:  $p=0.492$ ; block 2 high and intermediate licks:  
451 MFC:  $p=0.637$ ; OFC:  $p=0.999$ ).

452           The ITC findings, at least in MFC, support the idea that the “higher value” and “lower  
453 value” rewards in each context are being encoded differently across contexts. They indicate that  
454 MFC encodes absolute reward value. Qualitatively, the ITC values in MFC seem to have the  
455 same pattern as the lick rate (Figure 8B,C), similar to how MFC values reflected lick rate in the  
456 Blocked-Interleaved Task. However, post-hoc statistical testing revealed important differences.  
457 For example, the ITC in MFC differed significantly for high- vs. low-value rewards in both blocks  
458 1 and 2, but lick rate did not. Importantly, post-hoc analyses revealed a significant difference in  
459 ITC values in MFC for every reward combination except for the intermediate block 1 and  
460 intermediate block 2 rewards, which is evidence for absolute encoding of value (see  
461 Supplementary Figure 3A-B).

462           The encoding of value was less clear based on ITC measures from the OFC. These  
463 values did not directly match the licking behavior (in either rate, total licks, or bout duration)  
464 (compare Figure 8A,B with 8D), and did not show clear evidence for either absolute or relative  
465 encoding of reward. Instead, the results from Figure 8D indicate that OFC encodes reward  
466 value in a mixed absolute/relative manner (as in Supplementary Figure 3C).

## 467 DISCUSSION

468           We investigated the role of MFC and OFC in processing reward information as rats  
469 participated in various consummatory licking tasks. Rats process and express changes in  
470 reward size in roughly the same manner as with reward concentration, both behaviorally and  
471 electrophysiologically. LFP activity in both MFC and OFC is sensitive to changes in reward type  
472 (both volume and concentration). Our results reveal context-dependent value signals in both

474 regions through randomly presented rewards and by introducing a third reward in the task.  
475 Behaviorally, rats show evidence for a relative expression of rewards, while neural activity in  
476 MFC, but not OFC, shows an absolute encoding of reward value. Together, our findings suggest  
477 that rats sample rewards and commit to consuming a given reward when they are able to  
478 predict its value, and this behavior is coupled to neural activity in MFC and OFC that encode  
479 both the value of the reward and the animal's consummatory strategy. The subtle differences  
480 between the two regions follow the hypothesis that MFC represents action-outcome  
481 relationships and OFC represents stimulus-outcome relationships. MFC activity may provide the  
482 "value of the action" information to OFC, while OFC may evaluate the reward and provides  
483 feedback to MFC.

#### 484 *Rhythmic Activity and Reward Processing*

485           Similar to our previous studies (Horst and Laubach, 2013; Amarante et al., 2017),  
486 neural activity was entrained to the lick cycle across all tasks in both MFC and OFC.  
487 Entrainment was strongest for the high-value reward (either of size or sweetness) and varied  
488 with the animals consummatory strategy (persistently lick a highly preferred option or sample  
489 fluid and wait for better option). Previous studies have viewed this rhythmic activity as being  
490 driven by the act of licking, as rats naturally lick at 6-7 Hz (Travers et al, 1997; Weijnen, 1998;  
491 Host and Laubach, 2013). However, the activity cannot be explained solely by licking, as there  
492 are instances where phase-locking and behavior do not show the same pattern (e.g. the  
493 Blocked-Interleaved experiment), and the variety of studies reported here and in Amarante et al.  
494 (2017) suggest a higher order role for the neural activity in the control of consummatory  
495 behavior.

496           Specifically how the rhythmic activity contributes to the control of behavior might be  
497 best understood by considering how this general frequency range has been interpreted in other

498 types of behavioral tasks. Rhythms between 4 and 8 Hz are commonly referred to as “theta  
499 activity” and those found in the frontal cortex have been referred to as “frontal theta” (Cavanagh  
500 and Frank, 2014). There have been several proposals for the role of frontal theta in information  
501 processing. One idea is that the rhythm acts to break up sensory information into temporal  
502 chunks (Uchida and Mainen, 2003), and is related to the notion of a global oscillatory signal to  
503 synchronize neural activity across multiple brain structures throughout the taste-reward circuit  
504 (Gutierrez and Simon, 2013). Another idea is that frontal theta acts as an action monitoring  
505 signal (Cavanagh et al, 2012; Narayanan et al., 2013; Laubach et al., 2015), which can be  
506 generated through simple recurrent spiking network models (Bekolay et al., 2014). Finally,  
507 instead representing a specific function, frontal theta may act as a convenient “language” for  
508 distant brain regions to exchange information with each other (Womelsdorf et al., 2010). Our  
509 general findings contribute to this literature by suggesting that frontal theta acts as a value  
510 signal to guide consummatory behavior, which is the ultimate consequence of many goal-  
511 directed actions in natural environments.

## 512 *A Common Code for Reward Magnitude*

513 A major finding in the present study (Figures 1 and 2) was the similar electro-  
514 physiological signals in MFC and OFC are associated with the consumption of high and low  
515 concentration liquid sucrose rewards and large and small volume rewards. Although other  
516 studies have found either decreases (Kaplan et al., 2001) or increases in behavior with  
517 increases in concentration and volume rewards in the same study (Hulse et al., 1960; Collier  
518 and Myers, 1961; Collier and Wills, 1961), these studies did not investigate the  
519 electrophysiological correlates of consuming rewards. Our study is the first to show a  
520 generalized “value signal” in the frontal cortex that scales with increased size and increased  
521 concentration of liquid sucrose. These signals might underlie the computation of a common

522 currency (Montague and Berns, 2005; Levy and Glimcher, 2011; Levy and Glimcher, 2012;  
523 Strait et al., 2014) for the amount of nutrient available in a given food item and contribute to  
524 value-guided control of consumption.

### 525 *Evidence for the Contextual Control of Consumption*

526 In the Blocked-Interleaved Task (Figure 3A), rats who licked more, longer, and faster  
527 for the high concentration reward when rewards were blocked did not continue to do so during  
528 interleaved portion of the task (Figure 3B-C). Instead, they licked nearly equally for the high and  
529 low concentration solutions, a result that is suggestive of the loss of positive contrast effects for  
530 the higher value fluid that is commonly found in the blocked design (Parent et al., 2015a).  
531 Despite these differences in behavior, the rats' LFPs in MFC and OFC showed high levels of  
532 lick-entrained activity, essentially equal to that found during consumption of the higher value  
533 fluid in the blocked part of the session. This finding is hard to reconcile with enhanced lick  
534 entrainment reflecting reward contrast effects. If positive contrast engenders entrainment, then  
535 LFPs should have shown reduced phase locking to the lick cycle in the interleaved portion of the  
536 task. Instead, the results might suggest that LFPs in MFC and OFC are entrained to licking  
537 when rats engage in persistent licking, as was found in the periods with high concentration  
538 access in the blocked part of the sessions and across the entire interleaved part of the session,  
539 and entrainment is reduced when rats switch to sampling the fluid during periods with low value  
540 access in the blocked part of the session. By this view, LFP entrainment to the lick cycle could  
541 serve as a contextual marker for reward state and the behavioral strategy deployed by the rat to  
542 sample and wait or persistently consume the liquid sucrose. This contextual information would  
543 depend on knowledge of the temporal structure of the reward deliveries. That is, when reward  
544 values are blocked, the rats have learned to expect alternative access to higher and lower  
545 reward values over extended periods of time (30 sec). By contrast, when reward values are

546 interleaved, the changes in values occur rapidly and are unpredictable. The reduction in lick  
547 entrainment might therefore reflect the animal's sampling strategy.

548 Contextual coding of reward value was also apparent in the Three Reward Task  
549 (Figures 6-8), where lick entrainment was stronger when the higher value option was available  
550 (Figure 7). In this case, the strength of engagement, for MFC but not OFC, tracked reward value  
551 in an absolute manner, with entrainment being higher for the 16% sucrose solution compared to  
552 the 8% solution when both were the "best" option (Figure 8C,D). These electrophysiological  
553 results were notably distinct from behavioral measures such as total licking output and lick rate  
554 (Figure 8A,B), which provided evidence for relative value comparisons. Our electrophysiological  
555 results support theories of absolute reward value (Hull, 1943; Spence, 1956; Flaherty, 1982), as  
556 opposed to theories of relative reward value (Crespi, 1942; Black, 1968; Webber et al., 2015).  
557 Our findings might also fit with the neuro-economics idea of menu invariance versus menu-  
558 dependent goods (Padoa-Schioppa, 2011), both of which have been supported by  
559 electrophysiological studies on OFC (Padoa-Schioppa and Assad, 2006; Padoa-Schioppa and  
560 Assad, 2008; Tremblay and Schultz, 1999; Saez et al., 2017).

561 It is not clear from our studies if the reduction in entrainment when low value rewards  
562 are available is an active or passive process. For example, it is possible that some active input  
563 to the MFC and OFC denotes the temporal context (e.g. dopamine, hippocampus) and  
564 enhances entrainment when the higher value option is available. Alternatively, signals from  
565 sensorimotor regions of the frontal cortex, which sit in between the MFC and OFC, the oral  
566 sensory and motor cortices (Yoshida et al., 2009), might be reduced during periods with less  
567 intense licking, leading to a passive reduction in overall frontal lick entrainment. Future studies  
568 are needed to address these neural mechanisms of licking-related synchrony in the rodent  
569 frontal cortex.

570 *Subtle Differences between MFC and OFC*

571 MFC and OFC are ideal locations for representing several aspects of value-based  
572 decision making, since the cortical regions receives sensory input, project to motor planning  
573 areas, and are connected with dopamine-rich areas either directly or through the striatum  
574 (Sugrue et al., 2005). Both OFC and MFC play a role in processing and evaluating rewards, and  
575 show activity modulated around the receipt and consumption of reward as well as the execution  
576 of rewarding behaviors. These areas may be contributing to value-based decision making in a  
577 goal-directed system (Balleine and Dickinson, 1998; Rangel et al., 2008; Rangel, 2013), where  
578 the value of a given reward is computed, and information about previous outcomes can be used  
579 to update values of predicted future outcomes (i.e., predicted rewards). This idea agrees with  
580 our findings of increased theta phase-locking in MFC and OFC LFPs during licks for the high  
581 value rewards, whether that reward is sweeter or larger in volume, which can be viewed as  
582 subjective value.

583 The electrophysiological results from the Blocked-Interleaved Task and Three Reward  
584 Task suggest that MFC and OFC, while showing similar results overall, may be contributing to  
585 processing reward information in different ways. In accord with a previous theory on proposed  
586 MFC and OFC functions (Balleine and Dickinson, 1998, Balleine and Dickinson, 2000;  
587 Schoenbaum et al., 2009; Sul et al., 2011; Passingham and Wise, 2012), MFC activity may be  
588 acting to maintain and optimize licking behavior in an action-centric manner, as reflected in  
589 measures such as the licking rate, a measure associated with vigor and sensitive to inactivation  
590 of the same cortical area in a progressive ratio licking task (Swanson et al., 2019). By contrast,  
591 OFC activity generally reflected differences in reward value, perhaps due to the different  
592 sensory properties of the fluids (Gutierrez et al., 2006), and was not sensitive to licking rate  
593 (vigor) or task engagement (total licks).



594 REFERENCES

- 595 Alexander, W. H., & Brown, J. W. (2011). Medial prefrontal cortex as an action-outcome  
596 predictor. *Nature Neuroscience*, *14*(10), 1338–1344. <https://doi.org/10.1038/nn.2921>
- 597 Amarante, L. M., Caetano, M. S., & Laubach, M. (2017). Medial frontal theta is entrained to  
598 rewarded actions. *Journal of Neuroscience*, *37*(44), 10757–10769.  
599 <https://doi.org/10.1523/JNeurosci.1965-17.2017>
- 600 Amarante, L. M., Newport, J., Mitchell, M., Wilson, J., & Laubach, M. (2019). An open source  
601 syringe pump controller for fluid delivery of multiple volumes. *eNeuro*,  
602 *6*(5).<https://doi.org/10.1523/eNeuro.0240-19.2019>
- 603 Balleine, B. W., & Dickinson, A. (1998). Goal-directed instrumental action: Contingency and  
604 incentive learning and their cortical substrates. *Neuropharmacology*, *37*(4–5), 407–419.  
605 [https://doi.org/10.1016/S0028-3908\(98\)00033-1](https://doi.org/10.1016/S0028-3908(98)00033-1)
- 606 Balleine, B. W., & Dickinson, A. (2000). The effect of lesions of the insular cortex on  
607 instrumental conditioning: evidence for a role in incentive memory. *Journal of*  
608 *Neuroscience*, *20*(23), 8954–8964. <https://doi.org/10.1523/JNeurosci.20-23-08954.2000>
- 609 Barreiros, I.V., Panayi, M.C., and Walton, M.E. (2020) Organisation of afferents along the  
610 anterior-posterior and medial-lateral axes of the rat OFC. bioRxiv.  
611 <https://doi.org/10.1101/2020.08.28.272591>
- 612 Bekolay, T., Laubach, M., & Eliasmith, C. (2014). A spiking neural integrator model of the  
613 adaptive control of action by the medial prefrontal cortex. *Journal of Neuroscience*,  
614 *34*(5), 1892–1902. <https://doi.org/10.1523/JNEUROSCI.2421-13.2014>
- 615 Black, R. W. (1968). Shifts in magnitude of reward and contrast effects in instrumental and  
616 selective learning: A reinterpretation. *Psychological Review*, *75*(2), 114–126.  
617 <https://doi.org/10.1037/h0025563>
- 618 Cavanagh, J. F., Zambrano-Vazquez, L., & Allen, J. J. B. (2012). Theta lingua franca: A  
619 common mid-frontal substrate for action monitoring processes: Omnipresent theta.  
620 *Psychophysiology*, *49*(2), 220–238. <https://doi.org/10.1111/j.1469-8986.2011.01293.x>
- 621 Cavanagh, J. F., & Frank, M. J. (2014). Frontal theta as a mechanism for cognitive control.  
622 *Trends in cognitive sciences*, *18*(8), 414–421. <https://doi.org/10.1016/j.tics.2014.04.012>
- 623 Collier, G., & Myers, L. (1961). The loci of reinforcement. *Journal of Experimental Psychology*,  
624 *61*(1), 57–66. <https://doi.org/10.1037/h0048851>
- 625 Collier, G., & Willis, F. N. (1961). Deprivation and reinforcement. *Journal of Experimental*  
626 *Psychology*, *62*(4), 377–384. <https://doi.org/10.1037/h0047144>
- 627 Crespi, L. P. (1942). Quantitative variation of incentive and performance in the white rat. *The*  
628 *American Journal of Psychology*, *55*(4), 467. <https://doi.org/10.2307/1417120>
- 629 Delorme, A., & Makeig, S. (2004). EEGLAB: An open source toolbox for analysis of single-trial  
630 EEG dynamics including independent component analysis. *Journal of Neuroscience*  
631 *Methods*, *134*(1), 9–21. <https://doi.org/10.1016/j.jneumeth.2003.10.009>
- 632 Flaherty, C. F. (1982). Incentive contrast: A review of behavioral changes following shifts in  
633 reward. *Animal Learning and Behavior*, *10*(4), 409–440.  
634 <https://doi.org/10.3758/BF03212282>



- 635 Gabbott, P. L. A., Warner, T. A., Jays, P. R. L., & Bacon, S. J. (2003). Areal and synaptic  
636 interconnectivity of prelimbic (area 32), infralimbic (area 25) and insular cortices in the  
637 rat. *Brain Research*, 993(1–2), 59–71. <https://doi.org/10.1016/j.brainres.2003.08.056>
- 638 Gabbott, P. L. A., Warner, T. A., Jays, P. R. L., Salway, P., & Busby, S. J. (2005). Prefrontal  
639 cortex in the rat: Projections to subcortical autonomic, motor, and limbic centers. *Journal*  
640 *of Comparative Neurology*, 492(2), 145–177. <https://doi.org/10.1002/cne.20738>
- 641 Gallagher, M., McMahan, R. W., & Schoenbaum, G. (1999). Orbitofrontal cortex and  
642 representation of incentive value in associative learning. *Journal of Neuroscience*,  
643 19(15), 6610–6614. <https://doi.org/10.1523/JNeurosci.19-15-06610.1999>
- 644 Gutierrez, R., Carmena, J. M., Nicolelis, M. A. L., & Simon, S. A. (2006). Orbitofrontal ensemble  
645 activity monitors licking and distinguishes among natural rewards. *Journal of*  
646 *Neurophysiology*, 95(1), 119–133. <https://doi.org/10.1152/jn.00467.2005>
- 647 Gutierrez, R., & Simon, S. (2013). Increases in spike timing precision improves gustatory  
648 discrimination upon learning. In P. Di Lorenzo & J. Victor, *Spike Timing* (Vol. 20135633,  
649 pp. 321–342). CRC Press. <https://doi.org/10.1201/b14859-16>
- 650 Horst, N. K., & Laubach, M. (2013). Reward-related activity in the medial prefrontal cortex is  
651 driven by consumption. *Frontiers in Neuroscience*, 7.  
652 <https://doi.org/10.3389/fnins.2013.00056>
- 653 Hull, C.L. (1943). *Principles of Behavior* (Vol. 422). New York: Appleton-Century-Crofts.
- 654 Hulse, S. H., Snyder, H. L., & Bacon, W. E. (1960). Instrumental licking behavior as a function of  
655 schedule, volume, and concentration of a saccharine reinforcer. *Journal of Experimental*  
656 *Psychology*, 60(6), 359–364. <https://doi.org/10.1037/h0045841>
- 657 Izquierdo, A. (2017). Functional heterogeneity within rat orbitofrontal cortex in reward learning  
658 and decision making. *Journal of Neuroscience*, 37(44), 10529–10540.  
659 <https://doi.org/10.1523/JNeurosci.1678-17.2017>
- 660 Jarovi, J., Volle, J., Yu, X., Guan, L., & Takehara-Nishiuchi, K. (2018). Prefrontal theta  
661 oscillations promote selective encoding of behaviorally relevant events. *eNeuro*, 5(6).  
662 <https://doi.org/10.1523/Eneuro.0407-18.2018>
- 663 Kaplan, J. M., Baird, J. P., & Grill, H. J. (2001). Dissociation of licking and volume intake  
664 controls in rats ingesting glucose and maltodextrin. *Behavioral neuroscience*, 115(1),  
665 188.
- 666 Kesner, R. P., & Gilbert, P. E. (2007). The role of the agranular insular cortex in anticipation of  
667 reward contrast. *Neurobiology of Learning and Memory*, 88(1), 82–86.  
668 <https://doi.org/10.1016/j.nlm.2007.02.002>
- 669 Laubach, M., Amarante, L. M., Swanson, K., & White, S. R. (2018). What, if anything, is rodent  
670 prefrontal cortex? *Eneuro*, 5(5). <https://doi.org/10.1523/Eneuro.0315-18.2018>
- 671 Laubach, M., Caetano, M. S., & Narayanan, N. S. (2015). Mistakes were made: Neural  
672 mechanisms for the adaptive control of action initiation by the medial prefrontal cortex.  
673 *Journal of Physiology-Paris*, 109(1–3), 104–117.  
674 <https://doi.org/10.1016/j.jphysparis.2014.12.001>

- 675 Levy, D. J., & Glimcher, P. W. (2011). Comparing apples and oranges: using reward-specific  
676 and reward-general subjective value representation in the brain. *Journal of*  
677 *Neuroscience*, 31(41), 14693–14707. <https://doi.org/10.1523/JNeurosci.2218-11.2011>
- 678 Levy, D. J., & Glimcher, P. W. (2012). The root of all value: A neural common currency for  
679 choice. *Current Opinion in Neurobiology*, 22(6), 1027–1038.  
680 <https://doi.org/10.1016/j.conb.2012.06.001>
- 681 Lin, J.-Y., Roman, C., & Reilly, S. (2009). Insular cortex and consummatory successive negative  
682 contrast in the rat. *Behavioral Neuroscience*, 123(4), 810–814.  
683 <https://doi.org/10.1037/a0016460>
- 684 Montague, P. R., & Berns, G. S. (2002). Neural economics and the biological substrates of  
685 valuation. *Neuron*, 36(2), 265–284. [https://doi.org/10.1016/S0896-6273\(02\)00974-1](https://doi.org/10.1016/S0896-6273(02)00974-1)
- 686 Narayanan, N. S., Cavanagh, J. F., Frank, M. J., & Laubach, M. (2013). Common medial frontal  
687 mechanisms of adaptive control in humans and rodents. *Nature Neuroscience*, 16(12),  
688 1888–1895. <https://doi.org/10.1038/nn.3549>
- 689 Öngür, D., & Price, J. L. (2000). The organization of networks within the orbital and medial  
690 prefrontal cortex of rats, monkeys and humans. *Cerebral cortex*, 10(3), 206–219.  
691 <https://doi.org/10.1093/cercor/10.3.206>
- 692 Padoa-Schioppa, C. (2011). Neurobiology of economic choice: A good-based model. *Annual*  
693 *Review of Neuroscience*, 34(1), 333–359. <https://doi.org/10.1146/annurev-neuro-061010-113648>
- 694 Padoa-Schioppa, C., & Assad, J. A. (2006). Neurons in the orbitofrontal cortex encode  
695 economic value. *Nature*, 441(7090), 223–226. <https://doi.org/10.1038/nature04676>
- 696 Padoa-Schioppa, C., & Assad, J. A. (2008). The representation of economic value in the  
697 orbitofrontal cortex is invariant for changes of menu. *Nature Neuroscience*, 11(1), 95–  
698 102. <https://doi.org/10.1038/nn2020>
- 700 Parent, M. A., Amarante, L. M., Liu, B., Weikum, D., & Laubach, M. (2015a). The medial  
701 prefrontal cortex is crucial for the maintenance of persistent licking and the expression of  
702 incentive contrast. *Frontiers in Integrative Neuroscience*, 9.  
703 <https://doi.org/10.3389/fnint.2015.00023>
- 704 Parent, M. A., Amarante, L. M., Swanson, K., & Laubach, M. (2015b). Cholinergic and  
705 ghrelinergic receptors and KCNQ channels in the medial PFC regulate the expression of  
706 palatability. *Frontiers in behavioral neuroscience*, 9, 284.  
707 <https://doi.org/10.3389/fnbeh.2015.00284>
- 708 Passingham, R. E., & Wise, S. P. (2012). *The neurobiology of the prefrontal cortex: Anatomy,*  
709 *evolution, and the origin of insight*. Oxford University Press.
- 710 Paxinos, G., & Watson, C. (2013). *The rat brain in stereotaxic coordinates*. Seventh Edition.  
711 Elsevier Academic Press.
- 712 Petykó, Z., Gálosi, R., Tóth, A., Máté, K., Szabó, I., Szabó, I., Karádi, Z., & Lénárd, L. (2015).  
713 Responses of rat medial prefrontal cortical neurons to pavlovian conditioned stimuli and  
714 to delivery of appetitive reward. *Behavioural Brain Research*, 287, 109–119.  
715 <https://doi.org/10.1016/j.bbr.2015.03.034>

- 716 Petykó, Z., Tóth, A., Szabó, I., Gálosi, R., & Lénárd, L. (2009). Neuronal activity in rat medial  
717 prefrontal cortex during sucrose solution intake. *NeuroReport*, 20(14), 1235–1239.  
718 <https://doi.org/10.1097/WNR.0b013e32832fbf30>
- 719 Pratt, W. E., & Mizumori, S. J. Y. (2001). Neurons in rat medial prefrontal cortex show  
720 anticipatory rate changes to predictable differential rewards in a spatial memory task.  
721 *Behavioural Brain Research*, 123(2), 165–183. [https://doi.org/10.1016/S0166-](https://doi.org/10.1016/S0166-4328(01)00204-2)  
722 [4328\(01\)00204-2](https://doi.org/10.1016/S0166-4328(01)00204-2)
- 723 Rangel, A., Camerer, C., & Montague, P. R. (2008). A framework for studying the neurobiology  
724 of value-based decision making. *Nature Reviews Neuroscience*, 9(7), 545–556.
- 725 Rangel, A. (2013). Regulation of dietary choice by the decision-making circuitry. *Nature*  
726 *Neuroscience*, 16(12), 1717–1724. <https://doi.org/10.1038/nn.3561>
- 727 Riceberg, J. S., & Shapiro, M. L. (2017). Orbitofrontal cortex signals expected outcomes with  
728 predictive codes when stable contingencies promote the integration of reward history.  
729 *Journal of Neuroscience*, 37(8), 2010–2021. [https://doi.org/10.1523/JNeurosci.2951-](https://doi.org/10.1523/JNeurosci.2951-16.2016)  
730 [16.2016](https://doi.org/10.1523/JNeurosci.2951-16.2016)
- 731 Saez, R. A., Saez, A., Paton, J. J., Lau, B., & Salzman, C. D. (2017). Distinct roles for the  
732 amygdala and orbitofrontal cortex in representing the relative amount of expected  
733 reward. *Neuron*, 95(1), 70–77.e3. <https://doi.org/10.1016/j.neuron.2017.06.012>
- 734 Schoenbaum, G., & Roesch, M. (2005). Orbitofrontal cortex, associative learning, and  
735 expectancies. *Neuron*, 47(5), 633–636. <https://doi.org/10.1016/j.neuron.2005.07.018>
- 736 Schoenbaum, G., Roesch, M. R., Stalnaker, T. A., & Takahashi, Y. K. (2009). A new  
737 perspective on the role of the orbitofrontal cortex in adaptive behaviour. *Nature Reviews*  
738 *Neuroscience*, 10(12), 885–892. <https://doi.org/10.1038/nrn2753>
- 739 Simon, N. W., Wood, J., & Moghaddam, B. (2015). Action-outcome relationships are  
740 represented differently by medial prefrontal and orbitofrontal cortex neurons during  
741 action execution. *Journal of Neurophysiology*, 114(6), 3374–3385.  
742 <https://doi.org/10.1152/jn.00884.2015>
- 743 Siniscalchi, M. J., Wang, H., & Kwan, A. C. (2019). Enhanced population coding for rewarded  
744 choices in the medial frontal cortex of the mouse. *Cerebral Cortex*, 29(10), 4090–4106.
- 745 Spence, K.W. (1956). *Behavior Theory and Conditioning*.
- 746 Strait, C. E., Blanchard, T. C., & Hayden, B. Y. (2014). Reward value comparison via mutual  
747 inhibition in ventromedial prefrontal cortex. *Neuron*, 82(6), 1357–1366.  
748 <https://doi.org/10.1016/j.neuron.2014.04.032>
- 749 Sugrue, L. P., Corrado, G. S., & Newsome, W. T. (2005). Choosing the greater of two goods:  
750 Neural currencies for valuation and decision making. *Nature Reviews Neuroscience*,  
751 6(5), 363–375. <https://doi.org/10.1038/nrn1666>
- 752 Sul, J. H., Jo, S., Lee, D., & Jung, M. W. (2011). Role of rodent secondary motor cortex in  
753 value-based action selection. *Nature Neuroscience*, 14(9), 1202–1208.  
754 <https://doi.org/10.1038/nn.2881>
- 755 Swanson, K., Goldbach, H. C., & Laubach, M. (2019). The rat medial frontal cortex controls  
756 pace, but not breakpoint, in a progressive ratio licking task. *Behavioral neuroscience*,  
757 133(4), 385–397. <https://doi.org/10.1037/bne0000322>

- 758 Travers, J. B., Dinardo, L. A., & Karimnamazi, H. (1997). Motor and premotor mechanisms of  
759 licking. *Neuroscience and Biobehavioral Reviews*, 21(5), 631–647.  
760 [https://doi.org/10.1016/S0149-7634\(96\)00045-0](https://doi.org/10.1016/S0149-7634(96)00045-0)
- 761 Tremblay, L., & Schultz, W. (1999). Relative reward preference in primate orbitofrontal cortex.  
762 *Nature*, 398(6729), 704–708. <https://doi.org/10.1038/19525>
- 763 Uchida, N., & Mainen, Z. F. (2003). Speed and accuracy of olfactory discrimination in the rat.  
764 *Nature Neuroscience*, 6(11), 1224–1229. <https://doi.org/10.1038/nn1142>
- 765 van Duuren, E., van der Plasse, G., Lankelma, J., Joosten, R. N. J. M. A., Feenstra, M. G. P., &  
766 Pennartz, C. M. A. (2009). Single-cell and population coding of expected reward  
767 probability in the orbitofrontal cortex of the rat. *Journal of Neuroscience*, 29(28), 8965–  
768 8976. <https://doi.org/10.1523/JNeurosci.0005-09.2009>
- 769 van Wingerden, M., Vinck, M., Lankelma, J., & Pennartz, C. M. A. (2010). Theta-band phase  
770 locking of orbitofrontal neurons during reward expectancy. *Journal of Neuroscience*,  
771 30(20), 7078–7087. <https://doi.org/10.1523/JNeurosci.3860-09.2010>
- 772 Webber, E. S., Chambers, N. E., Kostek, J. A., Mankin, D. E., & Cromwell, H. C. (2015).  
773 Relative reward effects on operant behavior: Incentive contrast, induction and variety  
774 effects. *Behavioural Processes*, 116, 87–99.  
775 <https://doi.org/10.1016/j.beproc.2015.05.003>
- 776 Weijnen, J. (1998). Licking behavior in the rat: Measurement and situational control of licking  
777 frequency. *Neuroscience and Biobehavioral Reviews*, 22(6), 751–760.  
778 [https://doi.org/10.1016/S0149-7634\(98\)00003-7](https://doi.org/10.1016/S0149-7634(98)00003-7)
- 779 Widmann, A., & Schröger, E. (2012). Filter effects and filter artifacts in the analysis of  
780 electrophysiological data. *Frontiers in Psychology*, 3.  
781 <https://doi.org/10.3389/fpsyg.2012.00233>
- 782 Womelsdorf, T., Vinck, M., Leung, L. S., & Everling, S. (2010). Selective theta-synchronization  
783 of choice-relevant information subserves goal-directed behavior. *Frontiers in Human*  
784 *Neuroscience*, 4. <https://doi.org/10.3389/fnhum.2010.00210>
- 785 Yoshida, A., Taki, I., Chang, Z., Iida, C., Haque, T., Tomita, A., Seki, S., Yamamoto, S.,  
786 Masuda, Y., Moritani, M., & Shigenaga, Y. (2009). Corticofugal projections to trigeminal  
787 motoneurons innervating antagonistic jaw muscles in rats as demonstrated by  
788 anterograde and retrograde tract tracing. *The Journal of comparative neurology*, 514(4),  
789 368–386. <https://doi.org/10.1002/cne.22013>

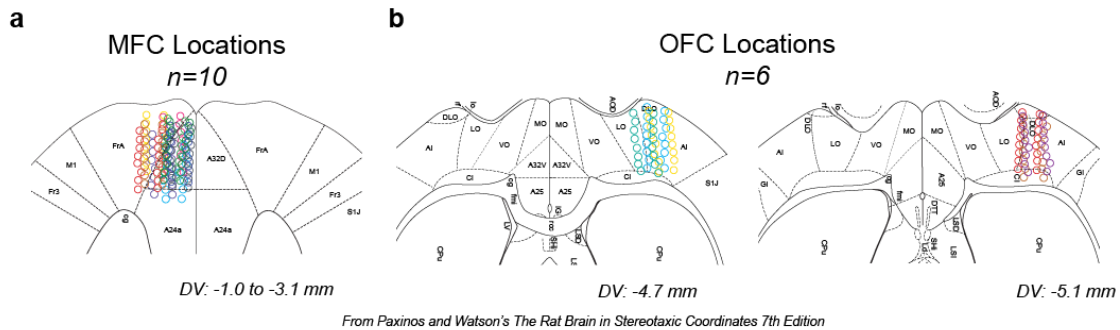

**Supplementary Figure 1. Electrode localization.** Locations of all electrodes plotted. A. MFC ( $n=10$  rats; 160 electrodes) electrode arrays were localized around area 32 (A32D) and M2 (FrA) from 1 to 3 mm ventral from the brain's surface. B. OFC ( $n=6$  rats; 96 electrodes) electrode arrays were localized around agranular insular (AI) and lateral orbital (LO) areas of OFC from 4.7 to 5.1 mm ventral from the brain's surface. Reconstructions were plotted over atlas figures from Paxinos and Watson's The Rat Brain in Stereotaxic Coordinates, 7<sup>th</sup> edition (2013).

790

## Supplementary Figures

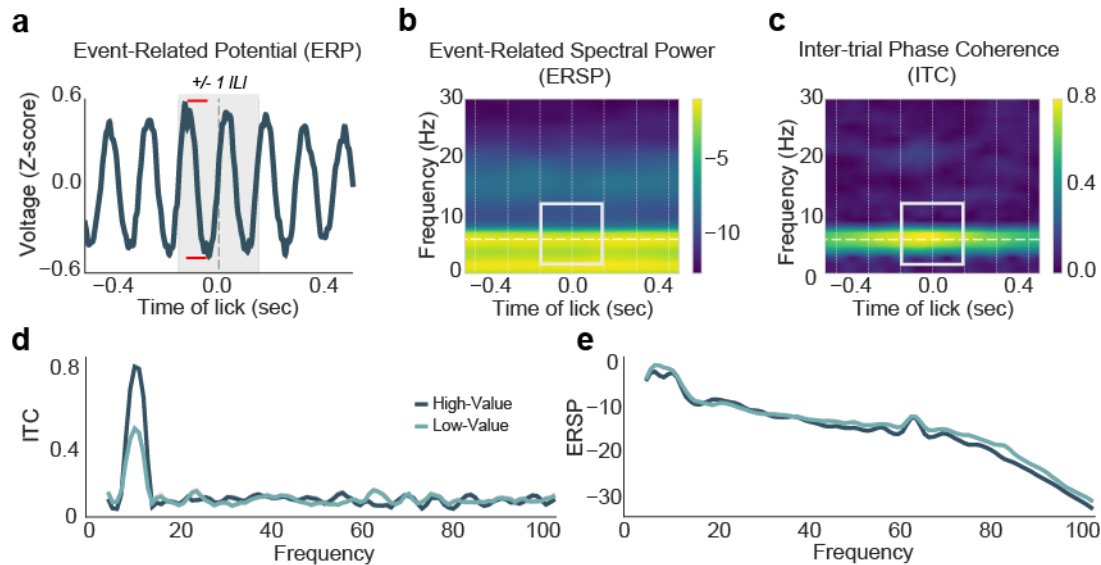

**Supplementary Figure 2. Types of Electrophysiological Measures Used to Assess LFP Activity Related to Behavior.** A. Event-related potentials (ERPs) were recorded around licks (time 0) after LFP activity was filtered and z-scored. Peak-to-peak analysis was performed on the ERP centered around each lick with a +1 inter-lick interval (ILI) window to calculate the amplitude size (red limits = maximum minus the minimum amplitude of the ERP). B,C. Spectral measures of power (B) and phase (C). Grouped statistics were based on the mean maximum Event-Related Spectral Power (ERSP) and Inter-Trial phase Coherence (ITC) value from 2-2 Hz and around +1 ILI (grey window). Vertical lines denote the rat's average ILIs. Horizontal line denotes the rat's median lick rate. D. Maximum ITC values over frequencies from 0-100 Hz from all 16 MFC electrodes from one example rat. E. Maximum ERSP measures over frequencies from 0-100 Hz in all 16 MFC electrodes from one example rat.



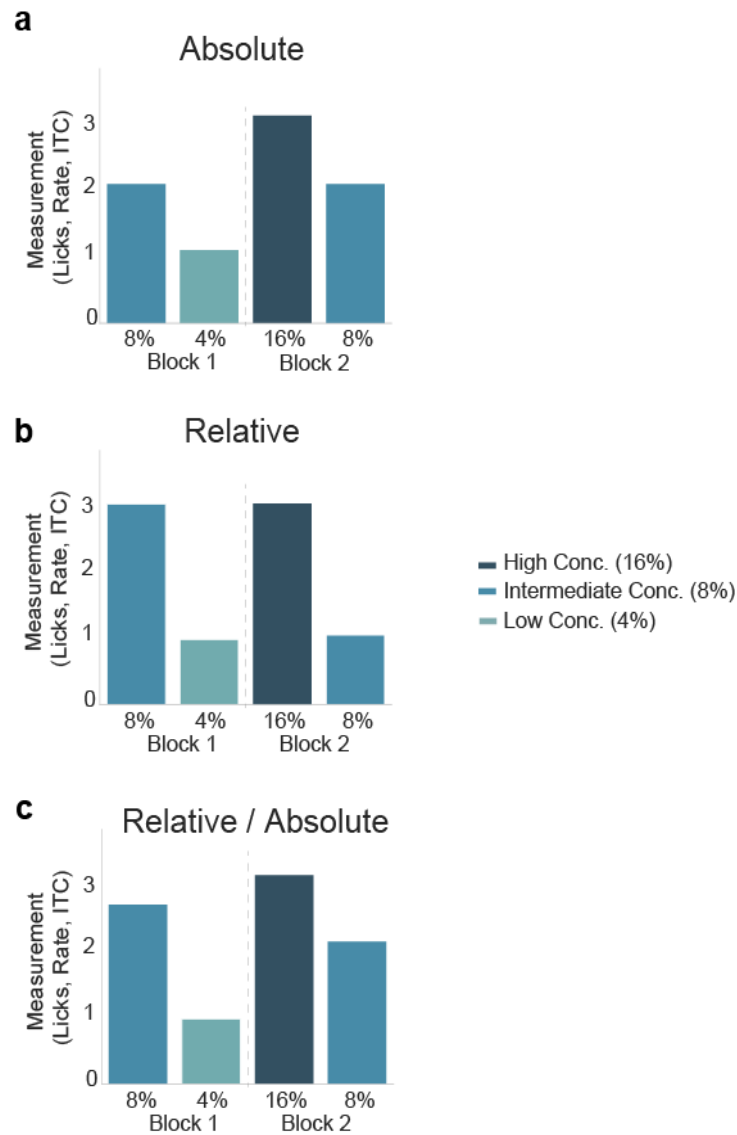

**Supplementary Figure 3. Hypothesis for Relative versus Absolute Encoding of Reward Value.** A. If rewards are processed in an absolute manner, we expected to see a graded expression (in lick counts, lick rate, bout duration, or ITC values) of reward value where the high (16%) concentration reward expression is greatest, followed by equal expression of the intermediate (8%) reward and then low expression of the low (4%) concentration reward. B. If rewards are processed in a relative manner, we expected to see a comparative process of rewards, where the “high value” (8% in block 1 or 16% in block 2) are processed similarly, and the focus is on the comparison within each block or context. C. An alternative hypothesis which incorporates a combination of relative and absolute processing of reward value, with partially mixed results of each process in A and B.
